# Supplementary material for: One pot oxidative esterification of benzaldehyde over a supported Cs-salt of mono nickel substituted phosphotungstate
Source: Royal Society of Chemistry journal article supplement (doi:10.1039/c6ra04362c), 2016-01-01
Supplement: c6ra04362c1.pdf [file c6ra04362c1.pdf]

## One pot oxidative esterification of benzaldehyde over supported Cs-salt of mono nickel substituted phosphotungstate

Anjali Patel<sup>\*a</sup>, Soyeb Pathan<sup>a</sup> and Pravya Prakashan<sup>a</sup>

### SI-1. Decomposition of H<sub>2</sub>O<sub>2</sub>

Decomposition study of H<sub>2</sub>O<sub>2</sub> with different amount of 30% PW<sub>11</sub>Ni/ZrO<sub>2</sub> was carried out by taking benzaldehyde (0.01 mol), H<sub>2</sub>O<sub>2</sub> (0.03 mol) and methanol (5 mL) in a 100 mL batch reactor provided with a double walled air condenser, magnetic stirrer, and a guard tube. The reaction mixture was refluxed at 80 °C for 3 h. The product was extracted with dichloromethane and the aqueous phase was collected. After appropriate dilution of aqueous phase, the % of H<sub>2</sub>O<sub>2</sub> was estimated by iodometrically.

**Table S1. Decomposition of H<sub>2</sub>O<sub>2</sub>**

| Amount of catalyts | % Decomposition of H <sub>2</sub> O <sub>2</sub> |
|--------------------|--------------------------------------------------|
| 7.5                | 47.8                                             |
| 10                 | 50.0                                             |
| 20                 | 63.6                                             |
| 30                 | 70.3                                             |
| 40                 | 82.9                                             |

Mole ratio (benzaldehyde/ H<sub>2</sub>O<sub>2</sub>) (1:3), temperature (80 °C), time (3 h), amount of methanol (5 ml).
